# Supplementary material
Source: PubMed Central journal article supplement (PMC5093920)
Supplement: jnm167387SupplementaryData.pdf [file jnm167387SupplementaryData.pdf]

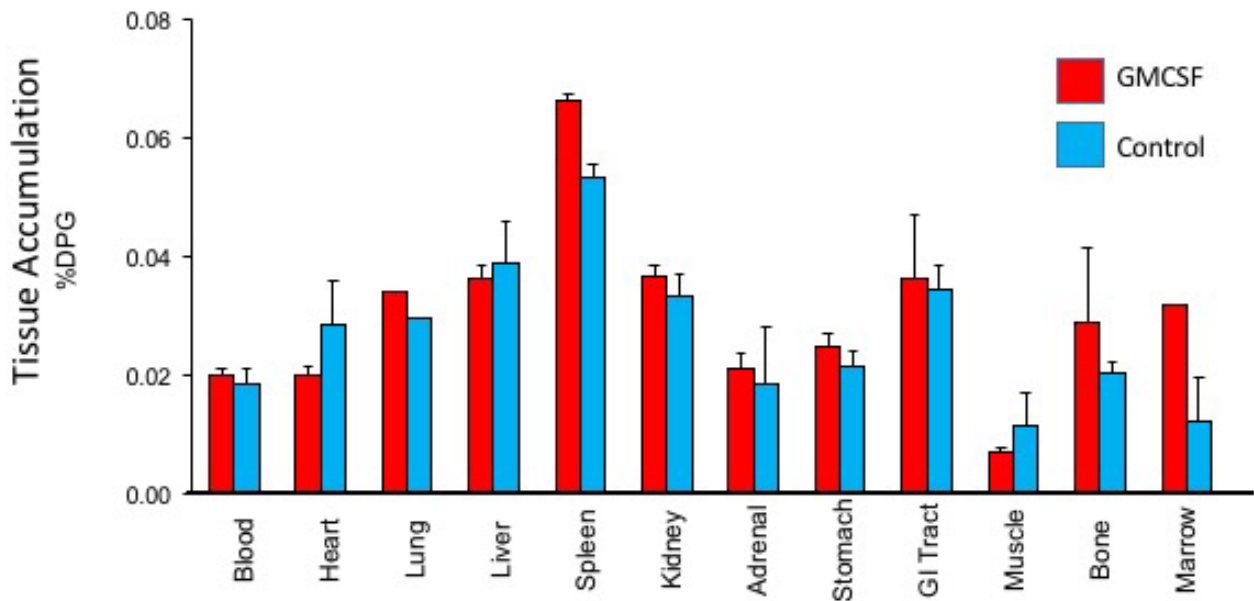

**Supplemental Figure 1:** Biodistribution Data. Biodistribution studies were done in a subset of 4 animals that had undergone PET/CT imaging (2 that had received GM-CSF and 2 after saline). Animals were killed with an overdose of pentobarbital sodium. To assess biodistribution, samples of blood, heart, lung, liver, spleen, kidney, adrenal gland, stomach, small intestine, skeletal muscle, and bone marrow were collected and weighed. A well-type gamma counter was used to measure radioactivity (LKB model 1282; LKB Instruments). Measurements were recorded as counts per minute less background and were corrected for radioactive decay. Results were expressed as percentage injected dose per gram (%ID/g).

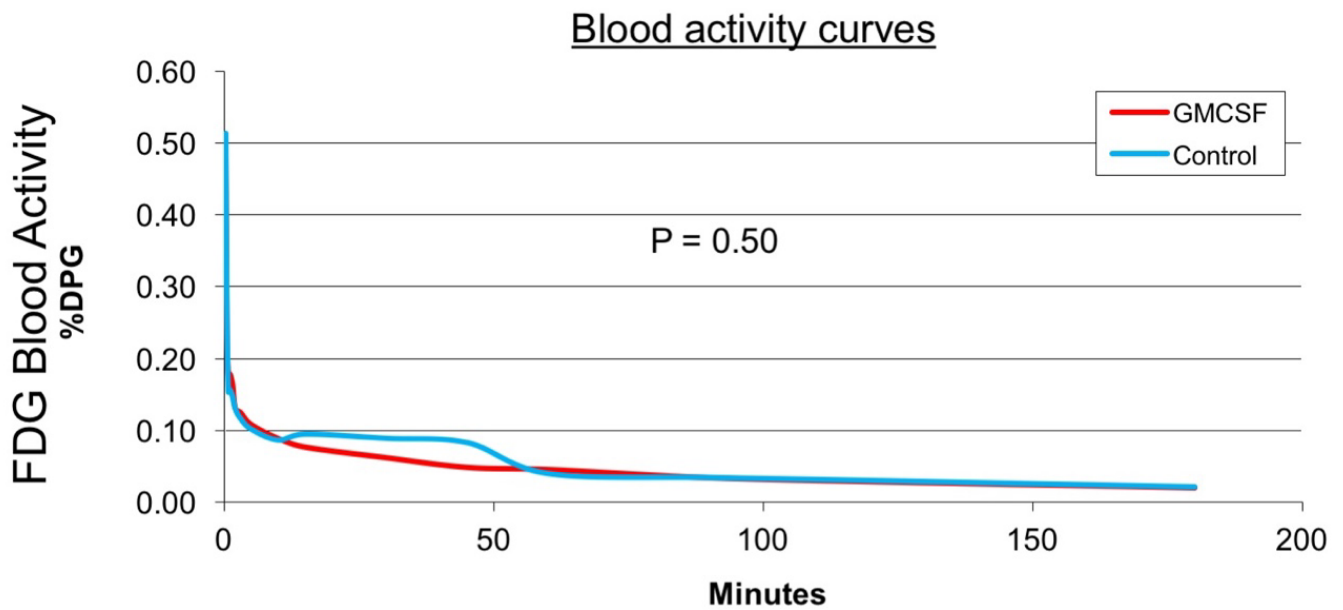

**Supplemental Figure 2:** Blood Time–Activity Curves. Blood time–activity studies were done in a subset of 4 animals (2 that had received GM-CSF and 2 after saline). After administration of  $^{18}\text{F}$ -FDG (mCi), venous blood samples were taken at 16 time points. A well-type gamma counter was used to measure radioactivity (LKB model 1282; LKB Instruments). Measurements were recorded as counts per minute less background and were corrected for radioactive decay. Results were expressed as percentage injected dose per gram (%ID/g). There was no difference between the activity curves after GM-CSF vs. saline.
